# Supplementary material for: Nitrogen doped hierarchically structured porous carbon fibers with an ultrahigh specific surface area for removal of organic dyes
Source: Royal Society of Chemistry journal article supplement (doi:10.1039/c8ra02512f), 2018-01-01
Supplement: c8ra02512f1.pdf [file c8ra02512f1.pdf]

# Nitrogen doped hierarchically structured porous carbon nanofibers with ultrahigh specific surface area for removal of organic dyes

Zhigao Zhu<sup>b</sup>, Jiayang Ma<sup>b</sup>, Chenghan Ji<sup>b</sup>, Yan Liu<sup>\*b</sup>, Wei Wang<sup>b</sup>, Fuyi Cui<sup>\*a</sup>

<sup>a</sup>College of Urban Construction and Environmental Engineering, Chongqing University, Chongqing 400044, P. R. China. Email: cuifuyi@hit.edu.cn (F. Cui)

<sup>b</sup>State Key Laboratory of Urban Water Resource and Environment (SKLUWRE), School of Environment, Harbin Institute of Technology, Harbin 150090, P. R. China. Email: liuyanntu@126.com (Y. Liu)

### Synthesis of BA-a

The BA-a monomer (2,2-bis(3-phenyl-3,4-dihydro-2H-1,3-benzoxazinyl) propane) was synthesized *via* a Mannich reaction using bisphenol-A, paraformaldehyde and aniline. Typically, 30 g of bisphenol-A, 15.78 g of paraformaldehyde and 24.48 g of aniline were added into a three necked flask with continuous stirring for 30 min. The resultant homogeneous solution was then gradually increased to 110 °C in 30 min and kept for 4 h with continuous stirring under N<sub>2</sub> protection, following cooling down to room temperature. Then the obtained yellow product was dissolved in 150 mL of dichloromethane and washed by 2 wt% of NaOH solution and pure water at least three times, respectively. The resultant yellow product was treated with anhydrous calcium chloride to remove the residual water, finally dried at 85 °C for 24 h.

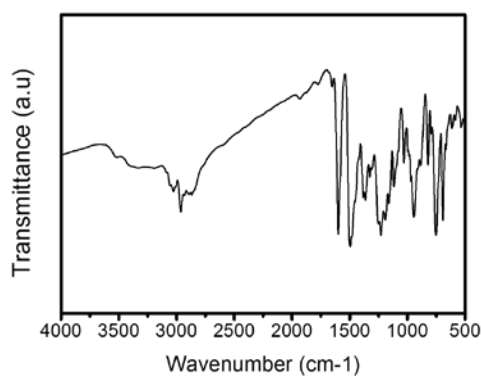

Fig. S1 FTIR spectrum of BA-a.

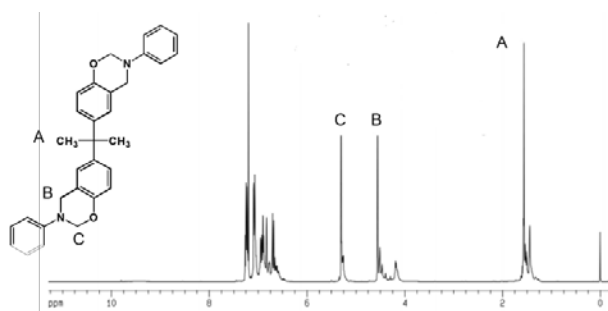

Fig. S2 <sup>1</sup>H NMR spectrograph of BA-a.

FTIR and  $^1\text{H}$ NMR are used to confirm the chemical structures of BA-a. FTIR spectrum displayed the characteristic absorptions at  $1230\text{-}1236\text{ cm}^{-1}$  (the asymmetric stretching of C-O-C), at  $1028\text{-}1036\text{ cm}^{-1}$  (symmetric stretching of C-O-C), at  $1327\text{-}1340\text{ cm}^{-1}$  ( $\text{CH}_3$  wagging), and at  $920\text{-}950$  (trisubstituted benzene ring) for BA-a, respectively. The  $^1\text{H}$ NMR spectrum shown in Fig. S2 further confirmed the structure of BA-a. The characteristic peaks at  $1.44\text{-}1.60$  ppm with a multiplet peaks was corresponded to  $-\text{CH}_3$ . The characteristic peaks at  $4.58$  and  $5.33$  ppm were corresponded to  $\text{N-CH}_2\text{-Ph}$  and  $\text{N-CH}_2\text{-O}$ , respectively. In addition, the characteristic peaks between  $6.67\text{-}7.25$  ppm was attributed to the Ph-H. Both the characterization of FTIR and  $^1\text{H}$ NMR confirmed the successfully synthesis of BA-a.

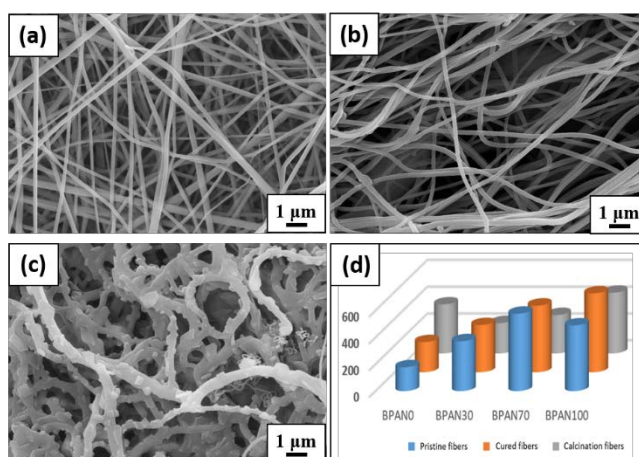

Fig. S3 FE-SEM images of (a) pure PAN fibers, (b) pre-treatment of PAN fibers at  $280\text{ }^\circ\text{C}$  in hot  $\text{N}_2$  atmosphere and (c) directly carbonized at  $1000\text{ }^\circ\text{C}$  in  $\text{N}_2$  atmosphere. (d) Showing the average diameters of relevant fibers.

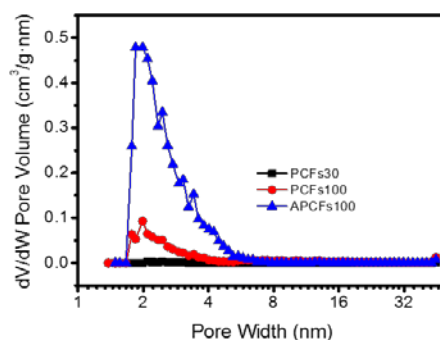

Fig. S4 Pore size distributions of relevant carbon fibers.

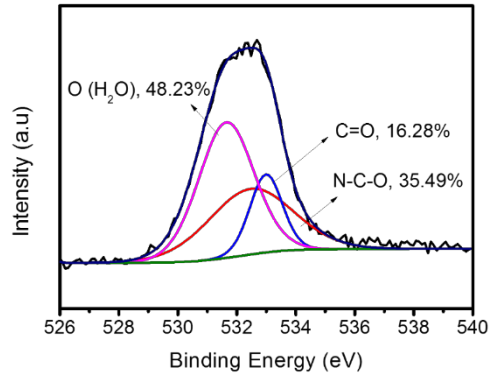

Fig. S5 O1s spectra of APCFs100.

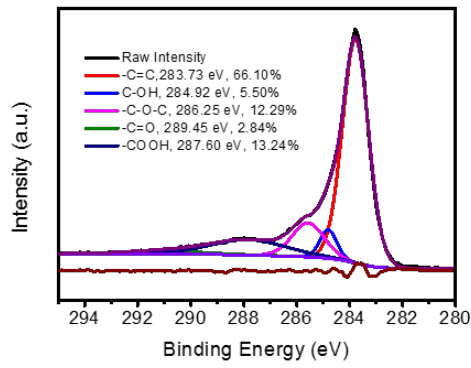

Fig. S6 C1s spectra of APCFs100.

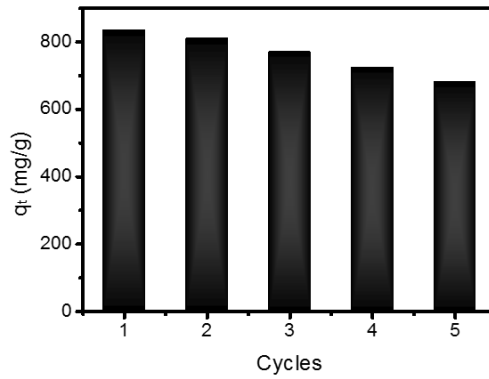

Fig. S7 Recyclability of APCFs100 for MeB adsorption in five cycles. ([adsorbent dosage] =10 mg, [adsorption time] =120 min, pH =7, T =20 °C).

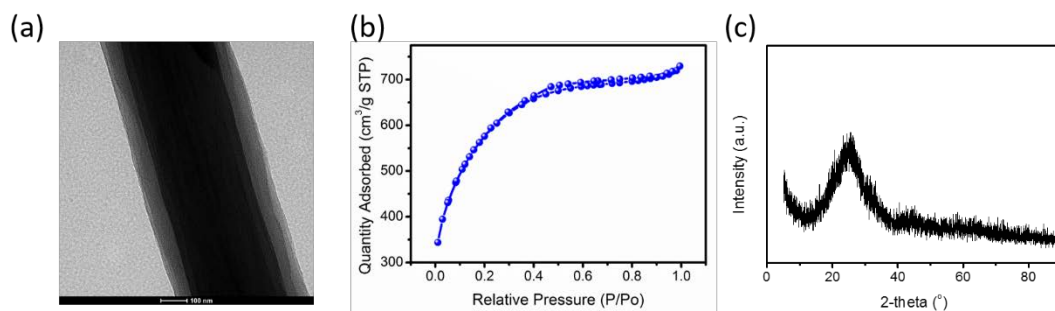

Fig. S8 (a) TEM image, (b) N<sub>2</sub> ad/desorption isotherm and (c) XRD pattern of APCFs100 after 5 cycles of adsorption-desorption.

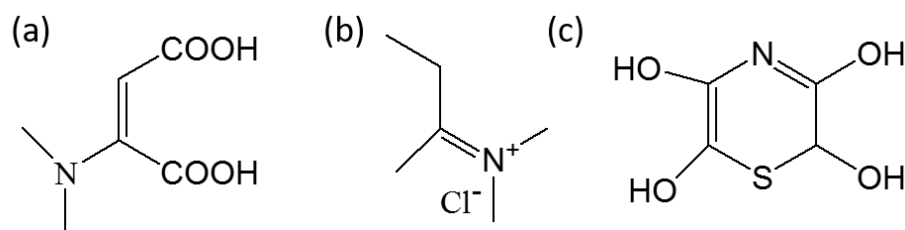

Fig. S9. (a) The degraded intermediate products of MeB.

The degraded byproducts of MeB were also identified using a UHPLC coupled triple quadrupole mass spectrometer. By the analysis of mass spectra, three degradation products of MeB have been identified, as shown in Fig. S9. According to these results, the degradation processes may be attributed as follows: Firstly, the PMS would be adsorbed on the surface of nanostructured APCFs100. Secondly, the PMS would be activated by nitrogen doped APCFs100 to generate highly reactive oxygen radicals. Thirdly, the strong oxidative capacity of reactive oxygen radicals would break the benzene ring to form the carbon-bearing free radicals and undergo electrophilic addition reaction, resulting in the formation of intermediates with hydroxyl groups. After that, the carbon-bearing free radicals were further oxidized by reactive oxygen groups, then rearranged to form the benzoquinone structure. Subsequently, the benzoquinone would also be oxidized to form the intermediates like 2-dimethylamino-1,4-butenedioic acid. Finally, the intermediates would be further oxidized completely to generate carbon dioxides and water.

Table S1. Structure parameters of relevant hierarchical porous carbon fibers.

| Samples  | $S_{\text{BET}}^{\text{a}}$<br>( $\text{m}^2/\text{g}$ ) | $S_{\text{micro}}^{\text{b}}$<br>( $\text{m}^2/\text{g}$ ) | $V_{\text{total}}^{\text{c}}$ ( $\text{cm}^3/\text{g}$ ) | $V_{\text{micro}}^{\text{d}}$ ( $\text{cm}^3/\text{g}$ ) |
|----------|----------------------------------------------------------|------------------------------------------------------------|----------------------------------------------------------|----------------------------------------------------------|
| PCFs30   | 125.22                                                   | 25.52                                                      | 0.13                                                     | 0.01                                                     |
| PCFs100  | 692.35                                                   | 525.49                                                     | 0.45                                                     | 0.23                                                     |
| APCFs100 | 2337.16                                                  | 1190.02                                                    | 1.21                                                     | 0.57                                                     |

<sup>a</sup> Total surface area was calculated by the Brunauer-Emmett-Teller (BET) method. <sup>b</sup> Microporous surface area was calculated by the Bareet, Joyner and Halenda (BJH) method. <sup>c</sup>  $S_{\text{micro}}$  indicates the surface area fraction of microporous. <sup>d</sup> The total pore volume was calculated at  $P/P_0=0.99$ . <sup>d</sup>  $V_{\text{micro}}$  was calculated by the Horvath-Kawazoe (HK) method.

Table S2. Comparison of the adsorption capacity of MeB by different adsorbents.

| Adsorbents                              | $q_{\text{m}}$ (mg/g) | Reference  |
|-----------------------------------------|-----------------------|------------|
| Bamboo based activated carbon           | 452                   | [1]        |
| Oxidized graphene oxide                 | 600                   | [2]        |
| Polysaccharides-modified graphene oxide | 780                   | [3]        |
| Sodium hydroxide activated carbon       | 1030                  | [4]        |
| Activated carbon                        | 588                   | [5]        |
| Commercial activated carbon             | 200                   | [6]        |
| Covalent organic frameworks             | 1691                  | [7]        |
| Triptycene-based 3D polymer             | 560                   | [8]        |
| Agar/graphene oxide composite aerogel   | 578                   | [9]        |
| Activated hierarchical carbon fiber     | 2020                  | This study |

## Reference:

1. B.H. Hameed, A.T. Din and A.L. Ahmad, *J. Hazard. Mater.*, 2017, **141**, 819-825.
2. S. Yang, Y. Si, Q. Fu, F. Hong, J. Yu, S.S. Al-Deyab, M. El-Newehy, B. Ding, *Nanoscale* 2014, **6**, 12445-12449.
3. Y. Qi, M. Yang, W. Xu, S. He and Y. Men., *J. Colloid Interf. Sci.*, 2017, **486**, 84-96.
4. A.F. Hassan, A.M. Abdel-Mohsen and M.M.G. Fouda, *Carbohydr. Polym.*, 2014, **102**, 192-198.
5. E.N. El Qada, S.J. Allen and G.M. Walker, *Chem. Eng. J.*, 2008, **135**, 174-184.
6. B. Bestani, N. Benderdouche, B. Benstaali, M. Belhakem and A. Addou, *Bioresource Technol*, 2008, **99**, 8441-8444.
7. X. Zhu, S. An, Y. Liu, J. Hu, H. Liu, C. Tian, D. Sheng, X. Yang, Abney. W, S. Dai and H. Wang, *AIChE J.*, 2017, **63**, 3470-3478.
8. Y. He, T. Xu, J. Hu, C. Peng, Q. Yang, H. Wang and H. Liu, *RSC Adv.*, 2017, **7**, 30500-30505.
9. L. Chen, Y. Li, Q. Du, Z. Wang, Y. Xia, E. Yedinak, J. Lou and L. Ci, *Carbohydr. Polym.*, 2017, **155**, 345-353.
